# Supplementary material for: Kinetics and Mechanism of Cation‐Induced Guest Release from Cucurbit[7]uril
Source: PubMed Central journal article supplement (PMC7318709; doi:10.1002/chem.201905633), 2020-05-19
Supplement: CHEM-26-7433-s001.pdf [file CHEM-26-7433-s001.pdf]

# Chemistry–A European Journal

Supporting Information

## **Kinetics and Mechanism of Cation-Induced Guest Release from Cucurbit[7]uril**

Zsombor Miskolczy,<sup>[a]</sup> Mónika Megyesi,<sup>[a]</sup> László Biczók,<sup>\*[a]</sup> Amrutha Prabodh,<sup>[b]</sup> and Frank Biedermann<sup>[b]</sup>

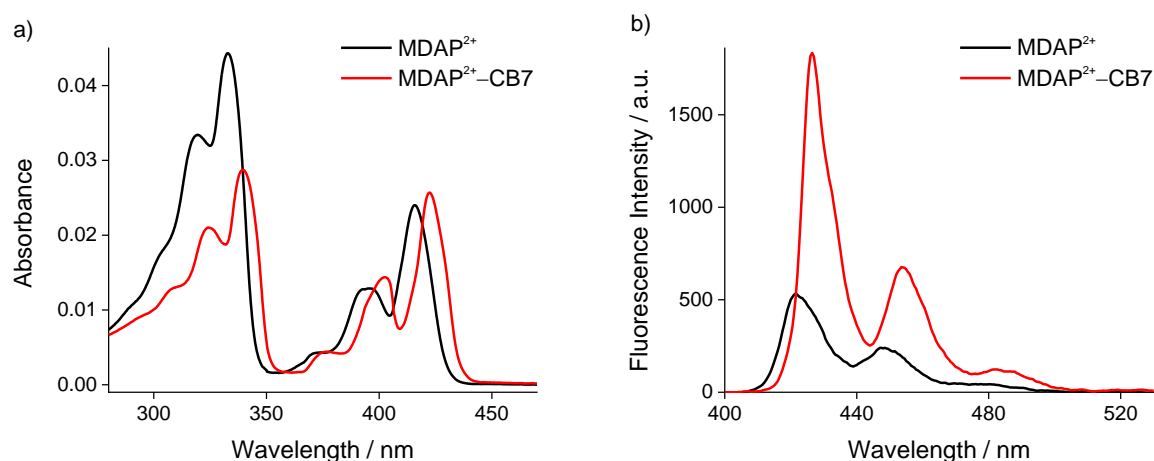

**Fig. S1** (a) Absorption and (b) fluorescence spectra of 2  $\mu\text{M}$  MDAP<sup>2+</sup> in the absence (black line) and in the presence of 8.6  $\mu\text{M}$  CB7 (red line). Excitation occurred at 339 nm.

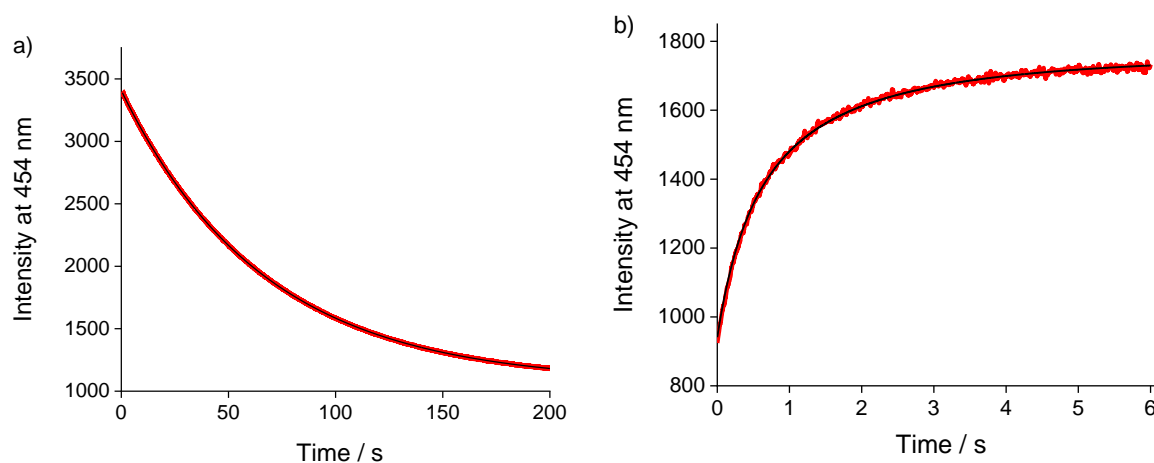

**Fig. S2** (a) Stopped flow signals at 454 nm in MDAP<sup>2+</sup>-CB7 solution (5  $\mu\text{M}$  at  $t = 0$  s) after mixing with the solution of AH<sup>+</sup> (300  $\mu\text{M}$  at  $t = 0$  s) in water. (b) Stopped flow signals at 454 nm after mixing MDAP<sup>2+</sup> and CB7 aqueous solutions. Initial concentrations at  $t = 0$  s were 0.0708  $\mu\text{M}$ . Excitation at 339 nm. The black lines represent the result of the nonlinear least-squares analysis.

## Formula for the overall rate constant of B<sup>+</sup> exit from BC and BCM

The fluorescence intensity at the monitoring wavelength ( $I(t)$ ) has contribution from BC and BCM emissions:

$$I(t) = \alpha[BC] + \beta[BCM] \quad (S1)$$

Since the back formation of B<sup>+</sup>-CB7 and B<sup>+</sup>-CB7-M<sup>n+</sup> is negligible in the presence of AH<sup>+</sup>, the dissociation rates are defined as follows:

$$\frac{d[BC]}{dt} = -k_{out}(BC)[BC] \quad (S2)$$

$$[BC] = [BC]_0 \exp(-k_{out}(BC)t) \quad (S3)$$

$$\frac{d[BCM]}{dt} = -k_{out}(BCM)[BCM] \quad (S4)$$

$$[BCM] = [BCM]_0 \exp(-k_{out}(BCM)t) \quad (S5)$$

where  $[BC]_0$  and  $[BCM]_0$  represent the BC and BCM concentrations at  $t = 0$  s

Substitution of eq. (S3) and (S5) into (S1) yields

$$I(t) = \alpha[BC]_0 \exp(-k_{out}(BC)t) + \beta[BCM]_0 \exp(-k_{out}(BCM)t) \quad (S6)$$

Single exponential decay was observed with  $k_{out}$  apparent rate constant because  $k_{out}(BC)$  and  $k_{out}(BCM)$  do not differ sufficiently for the resolution of the two decay components.

$$I(t) = (\alpha[BC]_0 + \beta[BCM]_0) \exp(-k_{out}t) \quad (S7)$$

The contribution of BC emissions to the overall fluorescence intensity:

$$I_{BC}(t)/I(t) = \alpha[BC]_0 \exp(-k_{out}t) / (\alpha[BC]_0 + \beta[BCM]_0) \exp(-k_{out}t)$$

$$I_{BC}(t)/I(t) = \alpha[BC]_0 / (\alpha[BC]_0 + \beta[BCM]_0) \quad (S8)$$

Similarly, the contribution of BCM emissions to the overall fluorescence intensity:

$$I_{BCM}(t)/I(t) = \beta[BCM]_0/(\alpha[BC]_0 + \beta[BCM]_0) \quad (S9)$$

The relationship between  $[BCM]_0$  and  $[BC]_0$  can be derived from the equilibrium constant of  $M^{n+}$  binding to BC:

$$[BCM]_0 = K_{BCM}[M]^{n+}[BC]_0 \quad (S10)$$

Substitution of (S10) into (S8) and (S9)

$$I_{BC}(t)/I(t) = \frac{\alpha}{\alpha + \beta K_{BCM}[M]^{n+}} = \frac{1}{1 + \frac{\beta}{\alpha} K_{BCM}[M]^{n+}} \quad (S11)$$

$$I_{BCM}(t)/I(t) = \frac{\beta K_{BCM}[M]^{n+}}{\alpha + \beta K_{BCM}[M]^{n+}} = \frac{\frac{\beta}{\alpha} K_{BCM}[M]^{n+}}{1 + \frac{\beta}{\alpha} K_{BCM}[M]^{n+}} \quad (S12)$$

The contributions of  $k_{out}(BC)$  and  $k_{out}(BCM)$  to the overall rate constant  $k_{out}$  are proportional to the contributions of BC and BCM emissions to the total fluorescence intensity.

$$k_{out} = k_{out}(BC) \frac{1}{1 + \frac{\beta}{\alpha} K_{BCM}[M]^{n+}} + k_{out}(BCM) \frac{\frac{\beta}{\alpha} K_{BCM}[M]^{n+}}{1 + \frac{\beta}{\alpha} K_{BCM}[M]^{n+}} \quad (S13)$$

**Formulas for the calculation of  $B^+CB7-M^{n+}$  /  $CB7-M^{n+}$  molar ratios and the concentrations of each component in equilibrium**

As metal cations ( $M^{n+}$ ) are in large excess relative to the other components, concentration of  $M^{n+}$  is not influenced by complex formations and practically equal to their total concentration (M).

$B_T$  and  $C_T$  represent the total concentrations of  $B^+$  and CB7, while B, C, BC, CM, and BCM denote the concentration of  $B^+$ , CB7,  $B^+CB7$ ,  $CB7-M^{n+}$  and  $B^+CB7-M^{n+}$ , respectively.

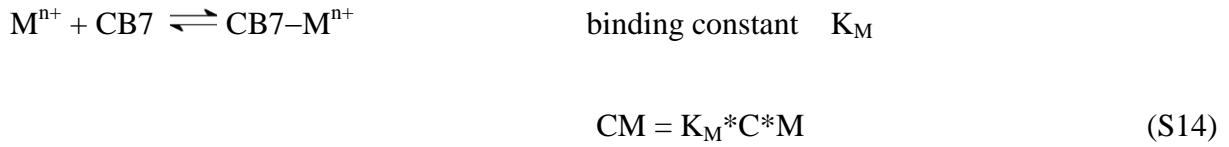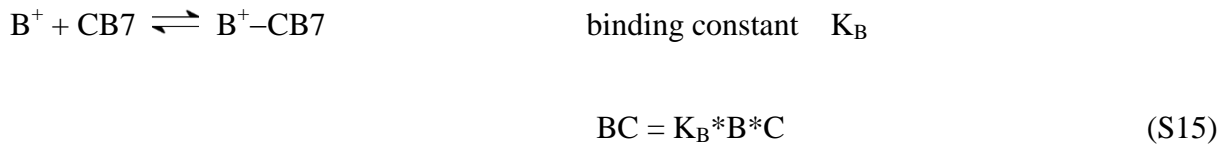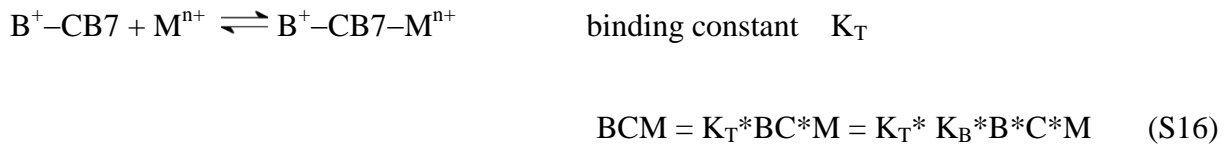

Material balance equations:

$$C_T = C + BC + BCM + CM \quad (S17)$$

$$B_T = B + BC + BCM \quad (S18)$$

From (S17) using (S14), (S15), and (S16)

$$C_T = C + K_B * B * C + K_T * K_B * B * C * M + K_M * M * C \quad (S19)$$

$$C = C_T / (1 + K_B * B + K_T * K_B * B * M + K_M * M) \quad (S20)$$

From (S18) using (S14), (S15), and (S16)

$$B_T = B + K_B * B * C + K_T * K_B * B * C * M \quad (S21)$$

$$B + K_B * B * C + K_T * K_B * B * C * M - B_T = 0 \quad (S22)$$

From (S22) using (S20)

$$B + K_B * B * C_T / (1 + K_B * B + K_T * K_B * B * M + K_M * M) + K_T * K_B * B * M * C_T / (1 + K_B * B + K_T * K_B * B * M + K_M * M) - B_T = 0 \quad (S23)$$

$$B * (1 + K_B * B + K_T * K_B * B * M + K_M * M) + K_B * B * C_T + K_T * K_B * B * M * C_T - B_T * (1 + K_B * B + K_T * K_B * B * M + K_M * M) = 0 \quad (S24)$$

$$B^2 * (K_B + K_T * K_B * M) + B * (1 + K_M * M + K_B * C_T + K_T * K_B * M * C_T - K_B * B_T - K_T * K_B * B_T * M) - (1 + K_M * M) * B_T = 0 \quad (S25)$$

The solution of the second order equation (S25) gives B.

(S16) and (S14) provide

$$BCM / CM = K_T * K_B * B / K_M$$

C, CM, BC, and BCM can be calculated on the basis of (S20), (S14), (S15), and (S16), respectively.

**Table S1** Calculated solution composition in equilibrium as a function of total  $\text{Ca}^{2+}$  concentration at 0.02 mM  $\text{B}^+$  and 1 mM CB7 total concentrations <sup>a</sup>

| $[\text{Ca}^{2+}]_{\text{total}}$<br>mM | $[\text{B}^+]$<br>$10^{-5}$ mM | $[\text{B}^+-\text{CB7}]$<br>$10^{-3}$ mM | $[\text{B}^+-\text{CB7}-\text{Ca}^{2+}]$<br>$10^{-3}$ mM. | $[\text{C}]$<br>$10^{-3}$ mM | $[\text{CM}]$<br>$10^{-3}$ mM |
|-----------------------------------------|--------------------------------|-------------------------------------------|-----------------------------------------------------------|------------------------------|-------------------------------|
| 5                                       | 2.13                           | 6.77                                      | 13.21                                                     | 13.80                        | 966.2                         |
| 6                                       | 2.26                           | 5.98                                      | 14.00                                                     | 11.53                        | 968.5                         |
| 7                                       | 2.35                           | 5.36                                      | 14.62                                                     | 9.90                         | 970.1                         |
| 8                                       | 2.43                           | 4.85                                      | 15.13                                                     | 8.67                         | 971.4                         |
| 9                                       | 2.50                           | 4.43                                      | 15.55                                                     | 7.72                         | 972.3                         |
| 10                                      | 2.55                           | 4.08                                      | 15.90                                                     | 6.95                         | 973.1                         |
| 11                                      | 2.60                           | 3.78                                      | 16.20                                                     | 6.32                         | 973.7                         |
| 12                                      | 2.64                           | 3.52                                      | 16.46                                                     | 5.80                         | 974.2                         |

<sup>a</sup> Binding constants of  $\text{B}^+-\text{CB7}$ ,  $\text{B}^+-\text{CB7}-\text{Ca}^{2+}$ , and CM formations are  $K_{BC} = 2.3 \times 10^7 \text{ M}^{-1}$

(ref. 26),  $K_{BCM} = 390 \text{ M}^{-1}$  (Table 1), and  $K_{CM} = 14000 \text{ M}^{-1}$  (ref. 16), respectively.

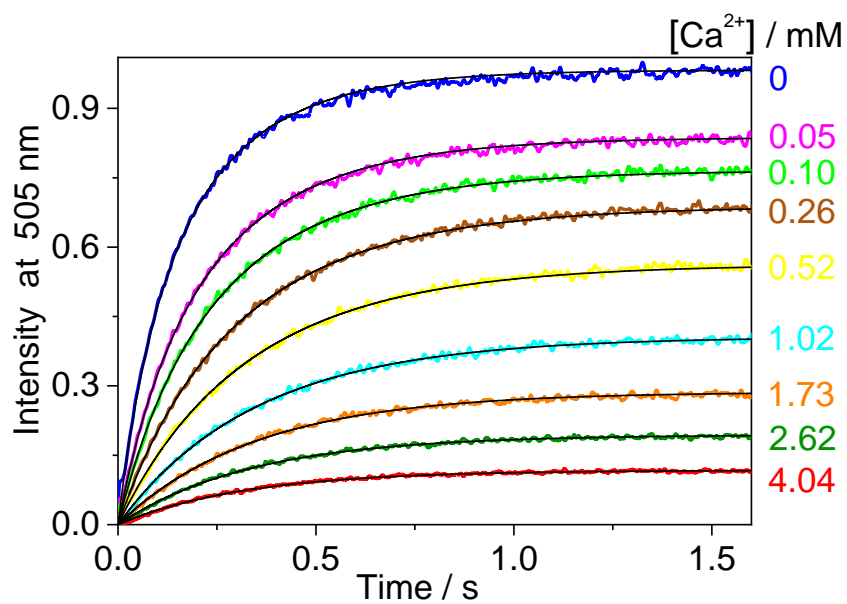

**Fig. S3** Stopped-flow signals recorded after 1:1 mixing of equimolar ( $0.25 \mu\text{M}$  at  $t = 0 \text{ s}$ )  $\text{B}^+$  and CB7 solutions at various  $\text{CaCl}_2$  concentrations. Excitation occurred at  $345 \text{ nm}$ .

**Table S2** Effect of  $\text{Li}^+$  and  $\text{Ba}^{2+}$  concentrations on the apparent rate constant of  $\text{B}^+$  inclusion in CB7 ( $k_{\text{in}}$ )

| [LiCl]<br>mM | $k_{\text{in}}^{[\text{a}]}$<br>$10^6 \text{ M}^{-1} \text{ s}^{-1}$ | [BaCl <sub>2</sub> ]<br>mM | $k_{\text{in}}^{[\text{a}]}$<br>$10^6 \text{ M}^{-1} \text{ s}^{-1}$ |
|--------------|----------------------------------------------------------------------|----------------------------|----------------------------------------------------------------------|
| 0            | 21.8                                                                 | 0                          | 19.7                                                                 |
| 1.11         | 20.5                                                                 | 0.005                      | 14.8                                                                 |
| 2.21         | 20.0                                                                 | 0.010                      | 11.5                                                                 |
| 3.77         | 19.6                                                                 | 0.021                      | 7.8                                                                  |
| 6.23         | 18.0                                                                 | 0.039                      | 5.4                                                                  |
| 10.45        | 15.7                                                                 | 0.065                      | 4.2                                                                  |
|              |                                                                      | 0.098                      | 4.0                                                                  |

<sup>[a]</sup> Estimated error  $\approx 10 \%$
